# Supplementary material
Source: publisher figshare collection journal article supplement (https://f1000.figshare.com/ndownloader/files/482379)
Supplement: Supplementary file 1 [file 482379]

day	div_trt	brach_trt	rep	cellspercolony
0	Monoculture	present	1	2.72
0	Monoculture	present	2	2.56
0	Monoculture	present	3	2.56
0	Polyculture	present	1	5.08
0	Polyculture	present	2	5.80
0	Polyculture	present	3	6.68
0	Polyculture	present	4	5.24
30	Monoculture	present	1	2.59
30	Monoculture	present	2	2.52
30	Monoculture	present	3	2.46
30	Polyculture	present	1	9.04
30	Polyculture	present	2	6.31
30	Polyculture	present	3	8.04
30	Polyculture	present	4	5.14
97	Monoculture	present	1	2.57
97	Monoculture	present	2	2.58
97	Monoculture	present	3	2.73
97	Polyculture	present	1	8.61
97	Polyculture	present	2	11.79
97	Polyculture	present	3	11.20
97	Polyculture	present	4	11.52
167	Monoculture	present	1	3.00
167	Monoculture	present	2	2.72
167	Monoculture	present	3	2.40
167	Polyculture	present	1	9.07
167	Polyculture	present	2	7.63
167	Polyculture	present	3	10.00
167	Polyculture	present	4	12.80
0	Monoculture	absent	1	2.91
0	Monoculture	absent	2	2.68
0	Monoculture	absent	3	2.57
0	Polyculture	absent	1	5.88
0	Polyculture	absent	2	6.58
0	Polyculture	absent	3	4.96
30	Monoculture	absent	1	2.96
30	Monoculture	absent	2	2.75
30	Monoculture	absent	3	2.46
30	Polyculture	absent	1	4.40
30	Polyculture	absent	2	3.72
30	Polyculture	absent	3	7.47
97	Monoculture	absent	1	2.72
97	Monoculture	absent	2	2.63
97	Monoculture	absent	3	2.68
97	Polyculture	absent	1	4.46
97	Polyculture	absent	2	3.12
97	Polyculture	absent	3	3.38
167	Monoculture	absent	1	2.48
167	Monoculture	absent	2	2.38
167	Monoculture	absent	3	2.65
167	Polyculture	absent	1	3.65
167	Polyculture	absent	2	3.04
167	Polyculture	absent	3	2.88
